# Supplementary material
Source: PubMed Central journal article supplement (PMC5893151)
Supplement: NIHMS865306-supplement-T1.pdf [file NIHMS865306-supplement-T1.pdf]

**Supplementary Table 1. Ranges (IQR) by Psoas Density (HUAC) or Psoas Area (PI)**

|                          | <b>HUAC (HU)</b> | <b>Male PI (cm<sup>2</sup>/m<sup>2</sup>)</b> | <b>Female PI (cm<sup>2</sup>/m<sup>2</sup>)</b> |
|--------------------------|------------------|-----------------------------------------------|-------------------------------------------------|
| <b>IQR1 (Sarcopenia)</b> | 22.2 – 38.4      | 3.62 – 7.77                                   | 3.27 – 4.72                                     |
| <b>IQR2</b>              | 38.5 – 43.6      | 7.78 – 8.62                                   | 4.73 – 5.97                                     |
| <b>IQR3</b>              | 43.7 – 47.2      | 8.63 – 10.36                                  | 5.98 – 6.99                                     |
| <b>IQR4</b>              | 47.3 – 72.7      | 10.37 – 14.78                                 | 7.00 – 9.11                                     |

IQR; Interquartile Range, HUAC; Hounsfield Unit average calculation, HU;Hounsfield Unit, PI; Psoas Index, IQR1; 1st - 25th percentile, IQR2; 26th - 50ths percentile, IQR3; 51st to 75th percentile, IQR4; 76th to 100th percentile
