# Supplementary material
Source: PubMed Central journal article supplement (PMC5893151)
Supplement: NIHMS865306-supplement-T2.pdf [file NIHMS865306-supplement-T2.pdf]

## Supplementary Table 2. Standardized List of Complications

### Neurologic

New Onset Seizure

New Cerebrovascular Accident (with confirmed imaging)

### Cardiovascular

Cardiac Arrhythmia (new onset atrial fibrillation, supraventricular tachycardia, ventricular tachycardia/fibrillation)

Myocardial Infarction (with confirmed elevated troponin)

Cardiogenic Shock (requiring vasopressor treatment)

### Respiratory

Acute respiratory failure (requiring intubation and mechanical ventilation > 48 hours)

### Gastrointestinal

Ileus

Acute Abdomen (unrelated to trauma)

### Renal

Acute renal failure (elevated creatinine  $\geq 1.5$  without prior history of chronic kidney disease)

### Hematologic

Deep Venous Thrombosis (with confirmed ultrasound imaging)

Pulmonary Embolism (with confirmed CT imaging)

### Infectious

Pneumonia

Urinary Tract Infection (with positive culture)

Wound Infection

Bacteremia (with positive cultures)

Septic Shock (requiring vasopressor support)
